# Supplementary material for: Comparison of the green-to-desert Sahara transitions between the Holocene and the last interglacial
Source: Copernicus journal article supplement (doi:10.5194/cp-18-2303-2022), 2022-10-18

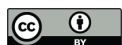

*Supplement of*

## **Comparison of the green-to-desert Sahara transitions between the Holocene and the last interglacial**

**Huan Li et al.**

*Correspondence to:* Hans Renssen ([hans.rensen@usn.no](mailto:hans.rensen@usn.no))

The copyright of individual parts of the supplement might differ from the article licence.

Figure S1. Pre-industrial tree and grass cover at 850 AD from LUH2 dataset

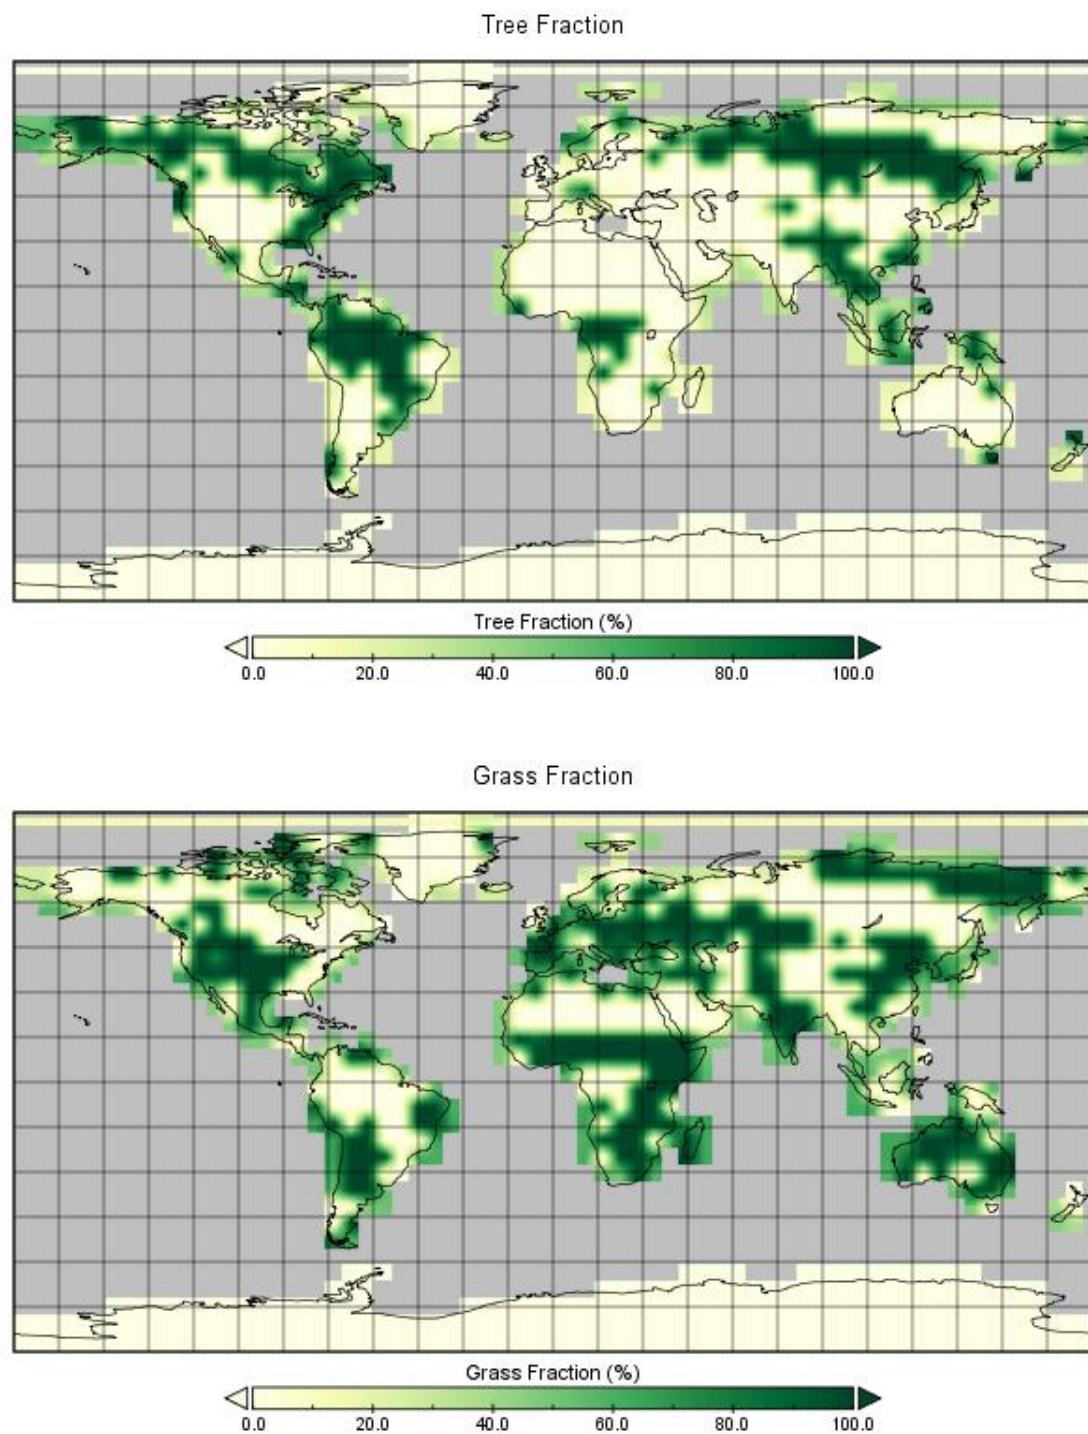

Figure S2. Surface temperature during the LIG (left two columns) and Holocene (right two columns) from LPJ-GUESS (left) and VECODE (right).

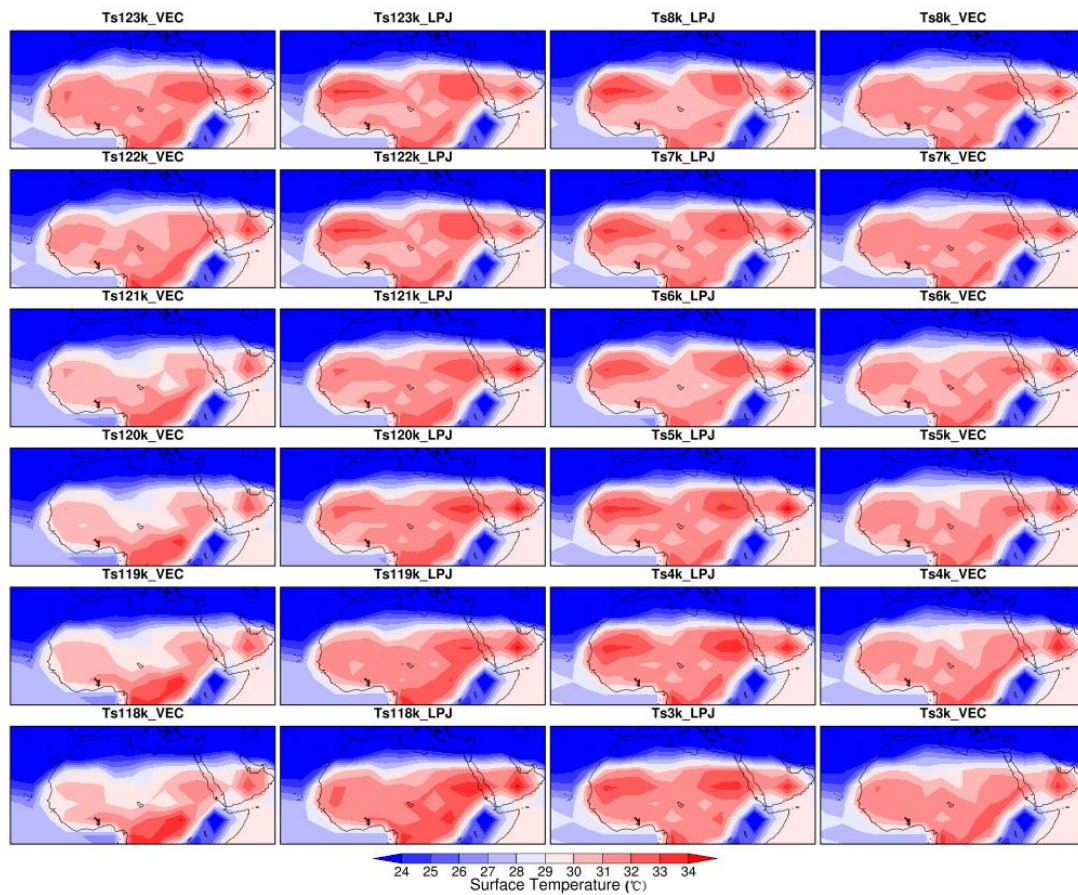

Figure S3. Surface temperature anomalies during the LIG (left two columns) and Holocene (right two columns), results from experiments with dynamical vegetation compared to those with fixed vegetation from LPJ-GUESS (left) and VECODE (right).

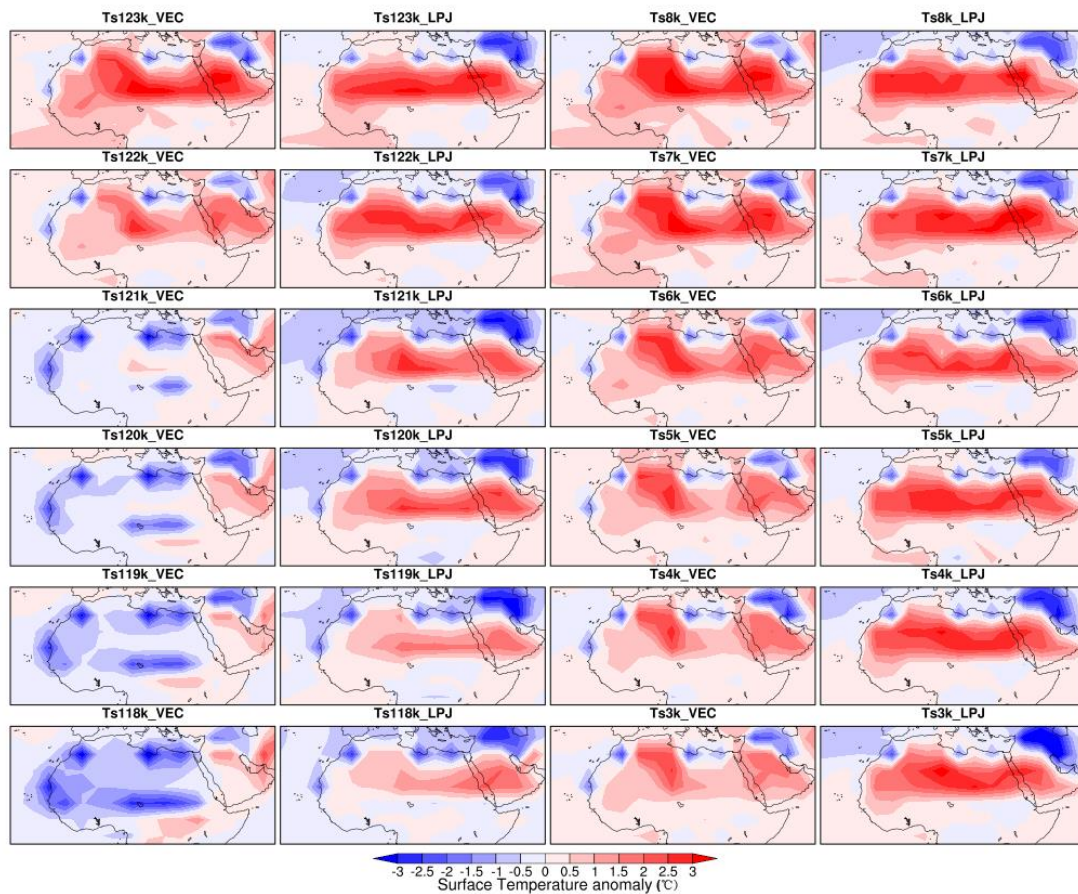



Figure S4. Precipitation during the LIG (left two columns) and Holocene (right two columns) from LPJ-GUESS (left) and VECODE (right).

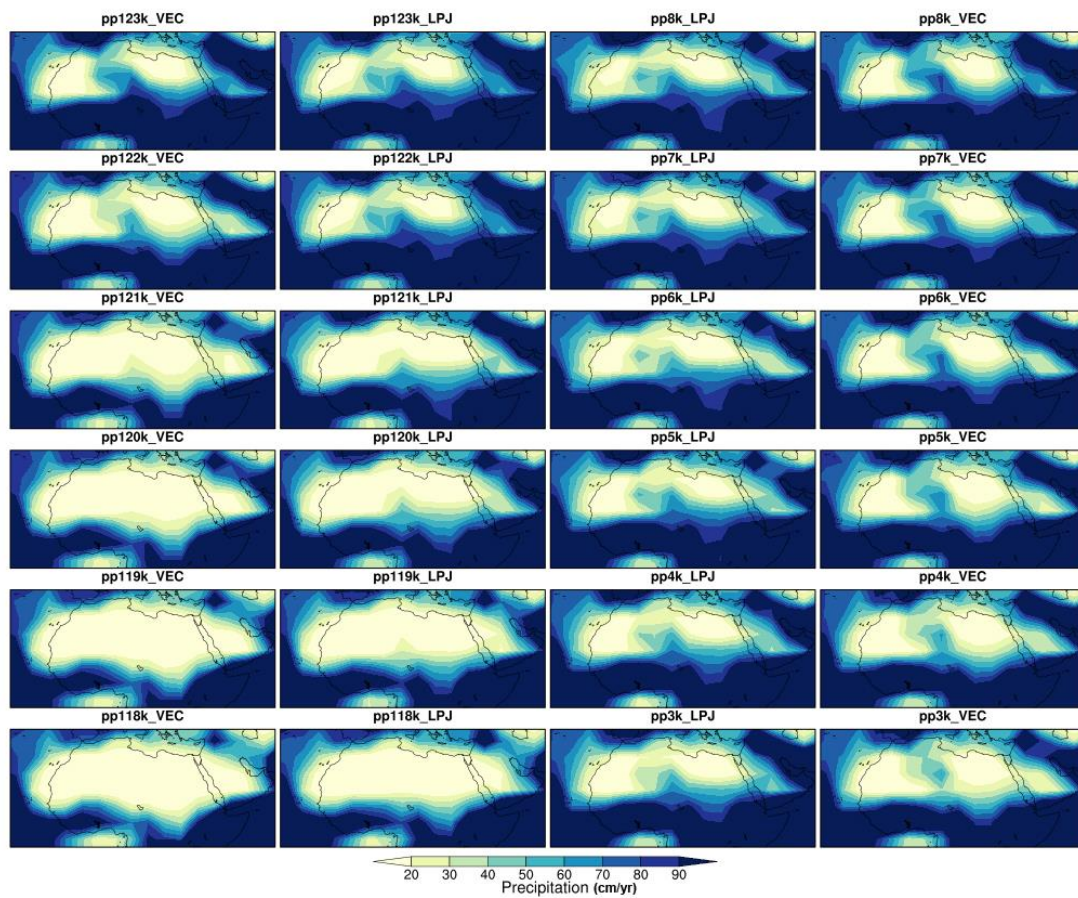

Figure S5. Precipitation anomalies during the LIG (left two columns) and Holocene (right two columns), results from experiments with dynamical vegetation compared to those with fixed vegetation from LPJ-GUESS (left) and VECODE (right).

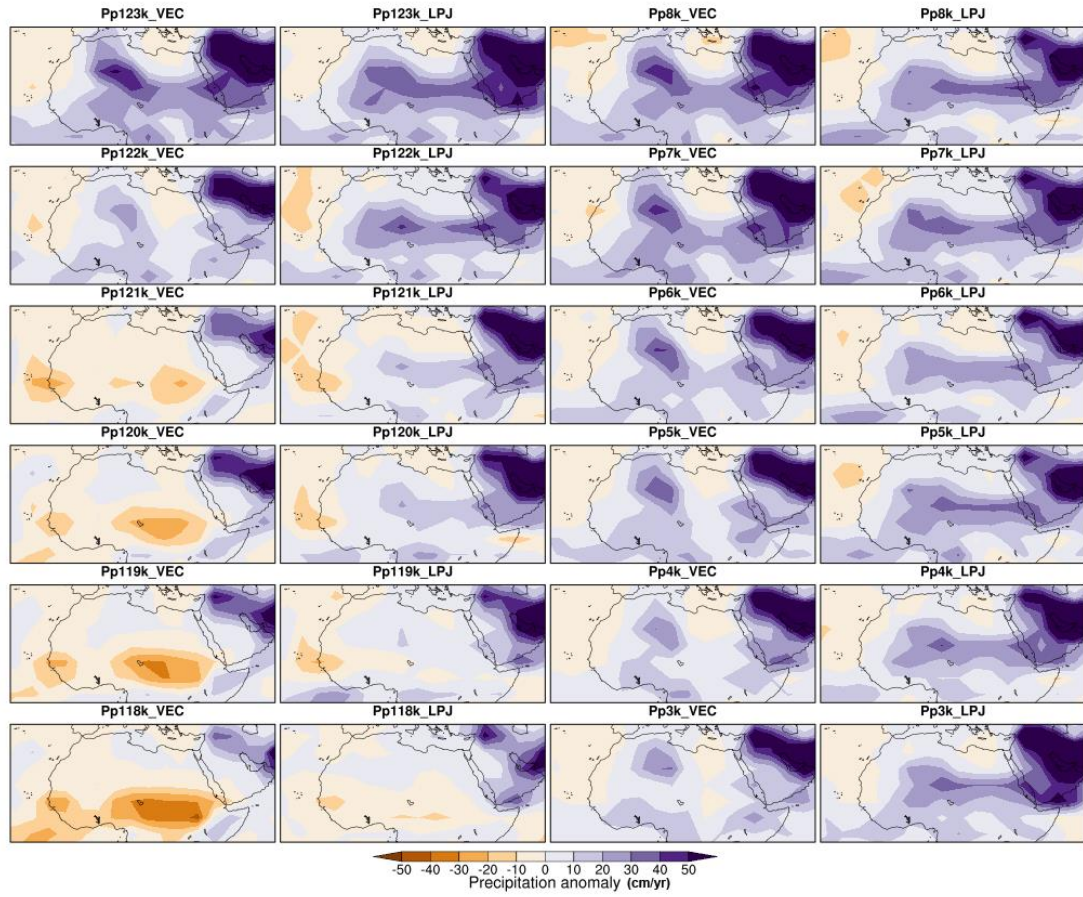

Figure S6. Total vegetation cover during the LIG (left two columns) and Holocene (right two columns) from LPJ-GUESS (left) and VECODE (right).

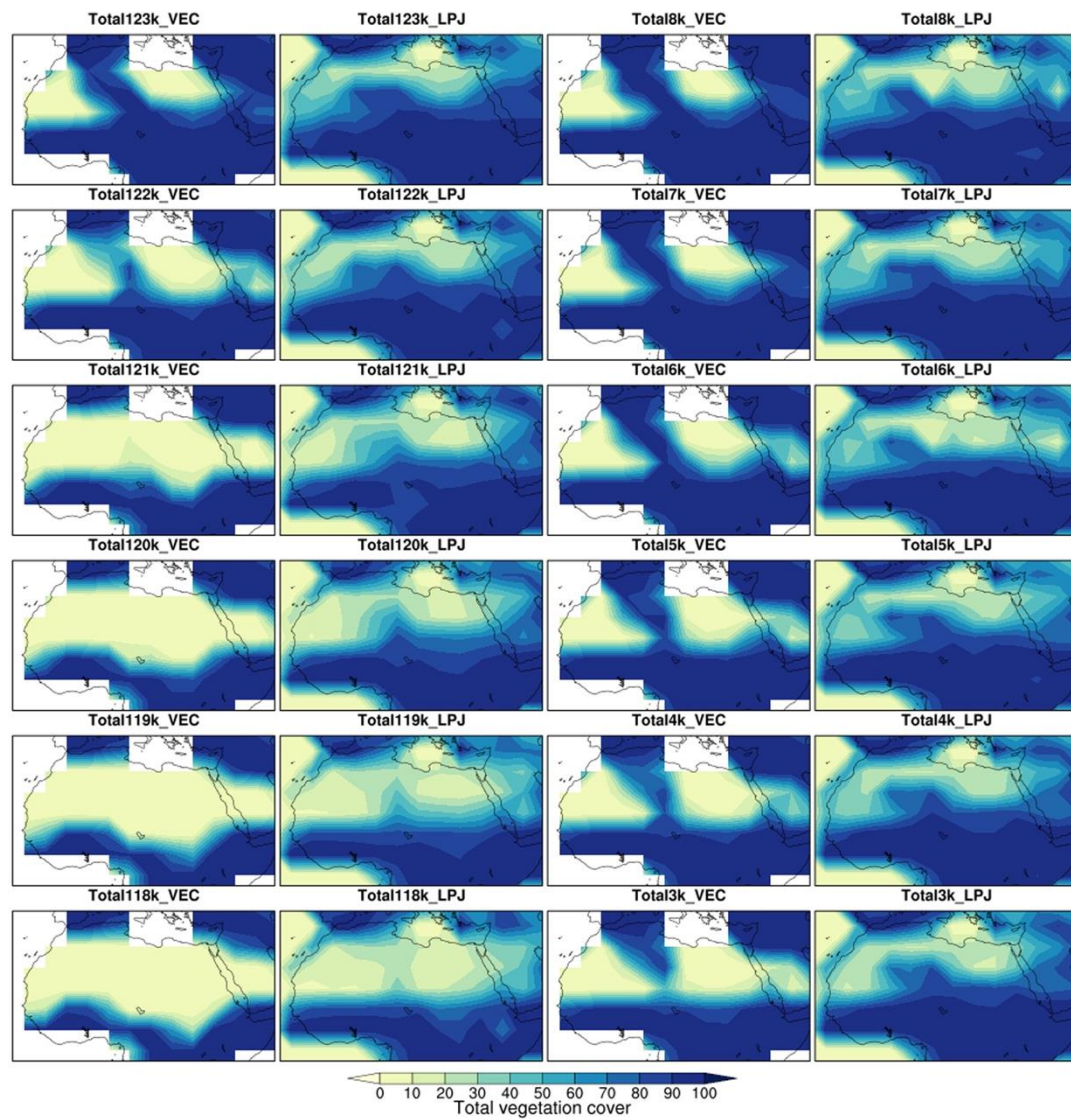

Supplement: Supplementary file 1 [file cp-18-2303-2022-supplement.pdf]
